# Supplementary material for: The Australian Youth Cancer Service: Developing and Monitoring the Activity of Nationally Coordinated Adolescent and Young Adult Cancer Care
Source: MDPI journal article supplement (doi:10.3390/cancers13112675), 2021-05-28
Supplement: s1 [file s1]

Supplementary Table S1

*YCS activity data on clinical trial enrolment, oncofertility care, psychosocial care, and survivorship care, 2016-17 to 2019-20*

|                                                                                          | 2016-17        | 2017-18        | 2018-19        | 2019-20        |
|------------------------------------------------------------------------------------------|----------------|----------------|----------------|----------------|
| <b>Enrolment in clinical trials</b>                                                      |                |                |                |                |
| Number/percentage of patients (new):                                                     |                |                |                |                |
| Newly enrolled in medical clinical trials                                                | 67<br>(10.2%)  | 87<br>(13.6%)  | 103<br>(15.0%) | 123<br>(17.6%) |
| <b>Oncofertility care</b>                                                                |                |                |                |                |
| Number/percentage of patients (new):                                                     |                |                |                |                |
| Provided with written and/or oral information on fertility risk and preservation options | 364<br>(55.4%) | 348<br>(54.3%) | 392<br>(57.0%) | 458<br>(65.6%) |
| Where fertility preservation was applicable <sup>a</sup>                                 | 482<br>(73.5%) | 453<br>(70.7%) | 480<br>(69.8%) | 506<br>(72.5%) |
| Number/percentage of patients (new, where fertility preservation was applicable), who:   |                |                |                |                |
| Undertook a fertility preservation procedure                                             | 231<br>(47.9%) | 227<br>(50.1%) | 246<br>(51.3%) | 297<br>(58.7%) |
| <b>Psychosocial care</b>                                                                 |                |                |                |                |
| Number of patients (newly diagnosed) who:                                                |                |                |                |                |
| Completed the AYA-POST                                                                   | 332<br>(67.1%) | 273<br>(61.8%) | 328<br>(64.4%) | 409<br>(75.0%) |
| Had their care discussed and psychosocial care plan developed at an MDT meeting          | 398<br>(80.4%) | 404<br>(91.4%) | 486<br>(95.5%) | 515<br>(94.5%) |

|                                                          |   |                |                |                |
|----------------------------------------------------------|---|----------------|----------------|----------------|
| <b>Survivorship care<sup>b</sup></b>                     |   |                |                |                |
| Number/percentage of patients (who completed treatment): |   |                |                |                |
| Who completed a psychosocial survivorship assessment     | - | 140<br>(61.4%) | 163<br>(70.9%) | 147<br>(65.9%) |
| Who were provided with a survivorship care plan          | - | 120<br>(52.6%) | 142<br>(61.7%) | 138<br>(61.9%) |
| Who were referred to any community-based service         | - | 185<br>(81.1%) | 165<br>(71.7%) | 157<br>(70.4%) |

<sup>a</sup>Fertility preservation may not be applicable to patients if, for example, treatment is unlikely to impact their fertility.

<sup>b</sup>These indicators were not collected until 2017-18
